# Supplementary material for: Structural basis of nanobody-mediated blocking of BtuF, the cognate substrate-binding protein of the Escherichia coli vitamin B12 transporter BtuCD
Source: PubMed Central journal article supplement (PMC5662663; doi:10.1038/s41598-017-14512-8), 2017-10-30
Supplement: 41598_2017_14512_MOESM1_ESM.pdf [file 41598_2017_14512_MOESM1_ESM.pdf]

**Structural basis of nanobody-mediated blocking of BtuF, the cognate substrate-binding protein of the *Escherichia coli* vitamin B12 transporter BtuCD**

**Supplementary information**

Mireku S.A., Sauer M.M., Glockshuber R. and Locher K.P.

*Institute of Molecular Biology and Biophysics, Eidgenössische Technische Hochschule (ETH)  
Zürich, CH-8093 Zürich, Switzerland*

Corresponding author: Kaspar Locher, +41-44-633-3991, [locher@mol.biol.ethz.ch](mailto:locher@mol.biol.ethz.ch)

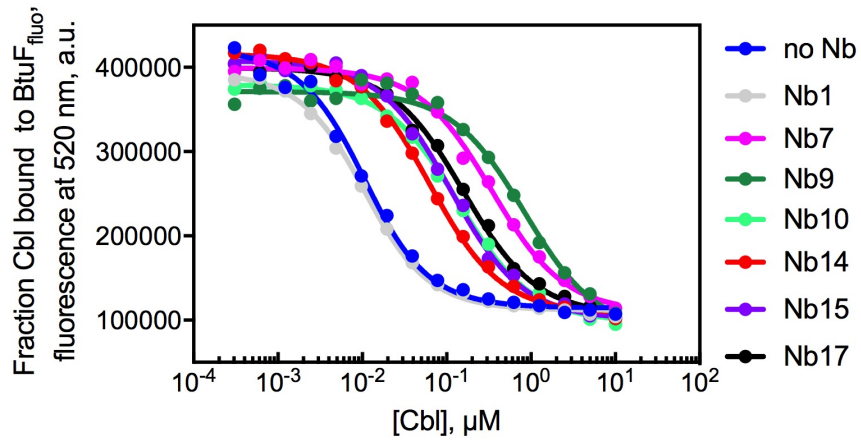

**Supplementary Figure 1: Equilibrium Cbl binding to BtuF<sub>fluo</sub> in the absence or presence of nanobodies.** Shown is the raw fluorescence data of the competitive binding assay presented in Figure 2B prior to normalization. The fluorescence at 520 nm of BtuF<sub>fluo</sub> (5 nM in all experiments) at pH 7.5 and 23°C was recorded as a function of Cbl concentration, either in the absence of nanobody or in the presence of a constant concentration of a specific nanobody (5 μM for Nb1 and Nb14; 1 μM for Nb7, Nb15 and Nb17; 100 nM for Nb9 and Nb10). Note that Nb1 is a control nanobody that does not bind BtuF. All nanobodies were used at concentrations above (6.5 to 106-fold) their inhibition constants (see Table 1), establishing nearly complete occupancy of BtuF<sub>fluo</sub> with the respective nanobody prior to addition of Cbl. The data were fitted according to a competition between nanobodies and Cbl for binding to BtuF<sub>fluo</sub>, with the initial and final fluorescence signal and the inhibition constants ( $K_i$  values) of the individual nanobodies (Table 1) as open parameters (solid lines) and the dissociation constant of BtuF<sub>fluo</sub>-Cbl complex (8.1 nM) obtained from the data in the absence of nanobody as fixed parameter. Note that the final fluorescence values (fluorescence of the BtuF-Cbl complex) are identical in all equilibrium titrations.

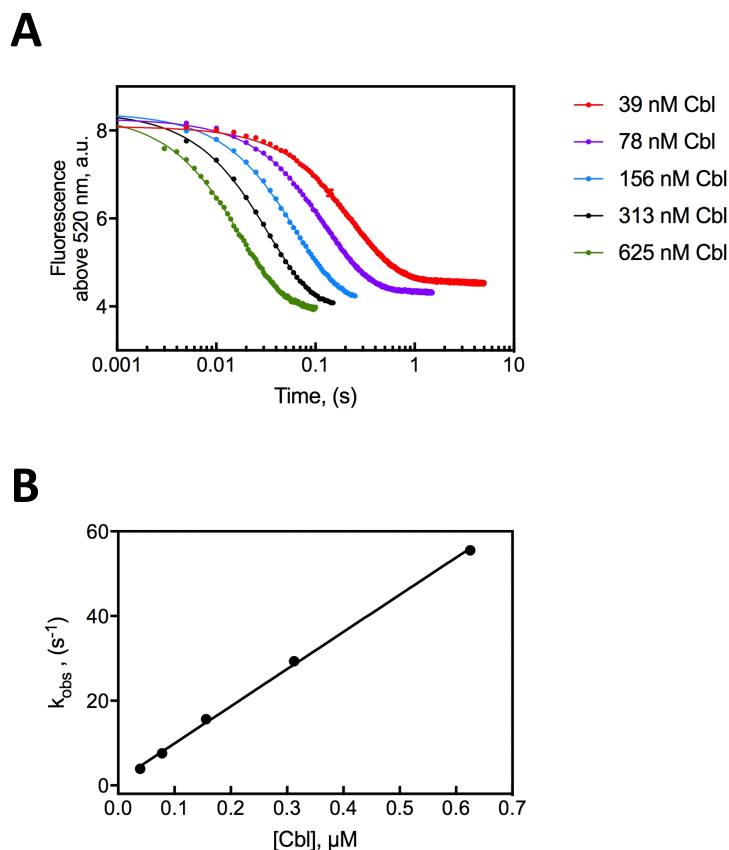

**Supplementary Figure 2: Stopped-flow fluorescence kinetics of Cbl binding to BtuF<sub>fluo</sub> at pH 7.5 and 23 °C.** (A) Original fluorescence traces (fluorescence above 520 nm) recorded after mixing BtuF<sub>fluo</sub> (final concentration: 10 nM) with different amounts of Cbl (final concentrations: 39 nM, 78 nM, 156 nM, 313 nM and 625 nM). Data were fitted according to first-order kinetics (solid lines). (B) Observed first-order rate constants ( $k_{obs}$ ) determined in A plotted against Cbl concentration. The slope of the linear fit corresponds to  $k_{on}$  and yielded a value of  $8.8 \pm 0.2 \times 10^7 \text{ M}^{-1}\text{s}^{-1}$  (see Table 1). The rate of spontaneous dissociation of the BtuF<sub>fluo</sub>-Cbl complex ( $k_{off}$ ) was calculated from the product of  $k_{on}$  and the  $K_d$  value determined in Figure 2B (see Table 1).

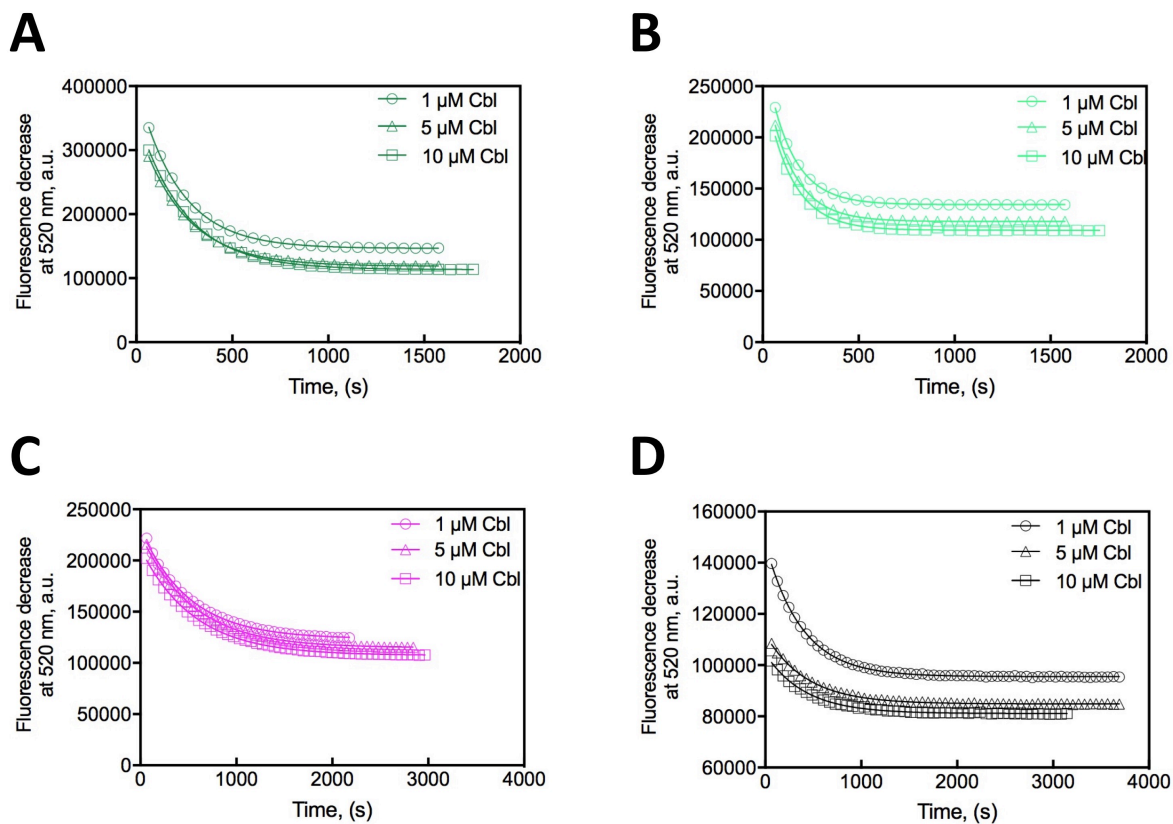

**Supplementary Figure 3: Determination of the rates ( $k_{\text{off}}$ ) of spontaneous dissociation of high-affinity nanobodies from BtuF<sub>fluo</sub> at pH 7.5 and 23 °C.** Shown is the raw fluorescence data of the results shown in Figure 3 and Table 1. BtuF<sub>fluo</sub> (10 nM) was incubated with 10 nM nanobody prior to the addition of Cbl. The resulting solutions of free BtuF<sub>fluo</sub> and BtuF<sub>fluo</sub>-nanobody complexes were then mixed with different concentrations of excess Cbl (1, 5, or 10 μM) and the kinetics of the decrease in BtuF<sub>fluo</sub> fluorescence at 520 nm were recorded. The kinetics are characterized by a very rapid fluorescence decrease caused by Cbl binding to free BtuF<sub>fluo</sub> (finished within the dead time of manual mixing) and a slow phase during which Cbl binds to BtuF<sub>fluo</sub> molecules that had dissociated from the respective nanobody. All kinetics proved to be independent of Cbl concentration, demonstrating that the slow fluorescence decrease directly monitored nanobody dissociation from BtuF<sub>fluo</sub>. Note that only the kinetics of the slow phases of fluorescence decrease (corresponding to nanobody dissociation from BtuF<sub>fluo</sub>) were evaluated. Shown are the kinetics of dissociation from BtuF<sub>fluo</sub> for Nb9 (A), Nb10 (B), Nb7 (C) and Nb17 (D). The obtained off-rates (mean value of the three rate constants obtained for each nanobody-BtuF complex) are listed in Table 1.

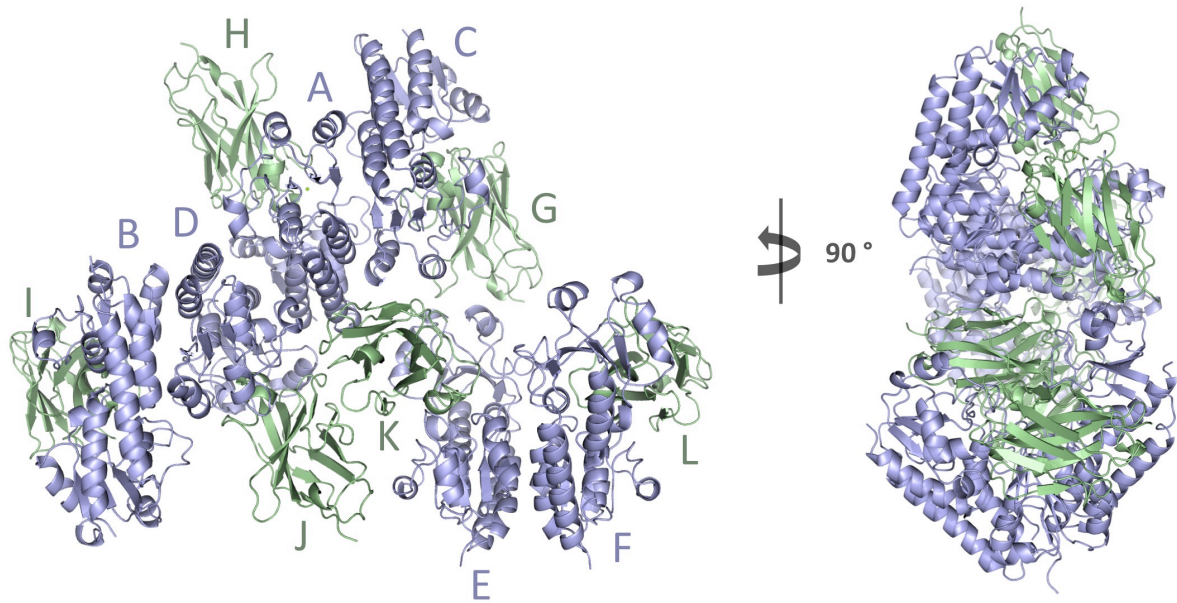

**Supplementary Figure 4: Composition of the asymmetric unit.** Cartoon representation shows BtuF in light blue (chains A-F) and Nb9 in green (chains G-L). Six Nb9-BtuF complexes were present in the asymmetric unit and ordered in a helix-like arrangement when viewed from the side. The following BtuF and Nb9 chains formed the biological assembly: A + H, B + I, C + G, D + J, E + K, F + L.

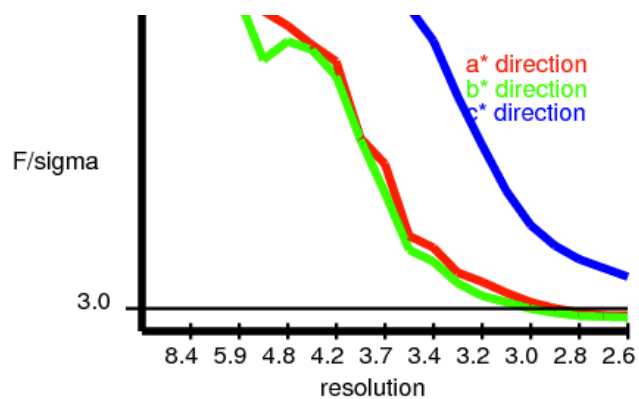

The recommended resolution limits along a\*,b\*,c\* are

2.8 Ang 3.0 Ang 2.6 Ang

**Supplementary Figure 5: Output of the diffraction anisotropy server (UCLA-DOE LAB)<sup>38</sup>.** Shown are the recommended resolution limits at which F/sigma drops below an arbitrary cutoff of 3.0.
